# Supplementary material
Source: publisher figshare collection journal article supplement (https://acs.figshare.com/ndownloader/files/4393012)
Supplement: Supplementary file 1 [file 4393012]

 
data_100601_l_h_149 
 
_audit_creation_method            SHELXL-97 
_chemical_name_systematic 
; 
 ? 
; 
_chemical_name_common             ? 
_chemical_melting_point           ? 
_chemical_formula_moiety          'C60 H42'  
_chemical_formula_sum 
 'C60 H42' 
_chemical_formula_weight          762.94 
 
loop_ 
 _atom_type_symbol 
 _atom_type_description 
 _atom_type_scat_dispersion_real 
 _atom_type_scat_dispersion_imag 
 _atom_type_scat_source 
 'C'  'C'   0.0033   0.0016 
 'International Tables Vol C Tables 4.2.6.8 and 6.1.1.4' 
 'H'  'H'   0.0000   0.0000 
 'International Tables Vol C Tables 4.2.6.8 and 6.1.1.4' 
 
_symmetry_cell_setting            'Monoclinic' 
_symmetry_space_group_name_H-M    'P 21/n' 
_symmetry_space_group_name_Hall   '-P 2yn'
 
loop_ 
 _symmetry_equiv_pos_as_xyz 
 'x, y, z' 
 '-x+1/2, y+1/2, -z+1/2' 
 '-x, -y, -z' 
 'x-1/2, -y-1/2, z-1/2' 
 
_cell_length_a                    10.5356(10) 
_cell_length_b                    9.7161(6) 
_cell_length_c                    41.525(2) 
_cell_angle_alpha                 90.00 
_cell_angle_beta                  94.721(7) 
_cell_angle_gamma                 90.00 
_cell_volume                      4236.3(5) 
_cell_formula_units_Z             4 
_cell_measurement_temperature     293(2) 
_cell_measurement_reflns_used   4217
_cell_measurement_theta_min     3.2268
_cell_measurement_theta_max     29.4320
 
_exptl_crystal_description        block
_exptl_crystal_colour             red 
_exptl_crystal_size_max           0.38 
_exptl_crystal_size_mid           0.35 
_exptl_crystal_size_min           0.28 
_exptl_crystal_density_meas       ? 
_exptl_crystal_density_diffrn     1.196 
_exptl_crystal_density_method     'not measured' 
_exptl_crystal_F_000              1608 
_exptl_absorpt_coefficient_mu     0.068 
_exptl_absorpt_correction_type    multi-scan'  
_exptl_absorpt_correction_T_min   0.974
_exptl_absorpt_correction_T_max   0.981
_exptl_absorpt_process_details    
;
CrysAlisPro, Oxford Diffraction Ltd.,
Version 1.171.33.53 (release 17-11-2009 CrysAlis171 .NET)
(compiled Nov 17 2009,16:58:22)
Empirical absorption correction using spherical harmonics,
 implemented in SCALE3 ABSPACK scaling algorithm.
;
 
_exptl_special_details 
; 
 ? 
; 
 
_diffrn_ambient_temperature       293(2) 
_diffrn_radiation_wavelength      0.71073 
_diffrn_radiation_type            MoK\a 
_diffrn_radiation_source          'fine-focus sealed tube' 
_diffrn_radiation_monochromator   graphite 
_diffrn_measurement_device_type   'Xcalibur, Atlas, Gemini ultra' 
_diffrn_measurement_method        '\w scans' 
_diffrn_detector_area_resol_mean  10.3592 
_diffrn_standards_number          ? 
_diffrn_standards_interval_count  ? 
_diffrn_standards_interval_time   ? 
_diffrn_standards_decay_%         ? 
_diffrn_reflns_number             19712 
_diffrn_reflns_av_R_equivalents   0.0393 
_diffrn_reflns_av_sigmaI/netI     0.0596 
_diffrn_reflns_limit_h_min        -10 
_diffrn_reflns_limit_h_max        12 
_diffrn_reflns_limit_k_min        -11 
_diffrn_reflns_limit_k_max        9 
_diffrn_reflns_limit_l_min        -50 
_diffrn_reflns_limit_l_max        49 
_diffrn_reflns_theta_min          3.23 
_diffrn_reflns_theta_max          25.35 
_reflns_number_total              7744 
_reflns_number_gt                 3701 
_reflns_threshold_expression      >2sigma(I) 
 
_computing_cell_refinement        
;
CrysAlisPro, Oxford Diffraction Ltd.,
Version 1.171.33.52 (release 06-11-2009 CrysAlis171 .NET)
(compiled Nov  6 2009,16:24:50)
;
_computing_data_collection        
;
CrysAlisPro, Oxford Diffraction Ltd.,
Version 1.171.33.52 (release 06-11-2009 CrysAlis171 .NET)
(compiled Nov  6 2009,16:24:50)
;
_computing_data_reduction         
;
CrysAlisPro, Oxford Diffraction Ltd.,
Version 1.171.33.52 (release 06-11-2009 CrysAlis171 .NET)
(compiled Nov  6 2009,16:24:50)
;
_computing_molecular_graphics     
;
 OLEX2: a complete structure solution, refinement and analysis program.
 Dolomanov et al., J. Appl. Cryst. (2009). 42, 339-341
;
_computing_publication_material   
;
 OLEX2: a complete structure solution, refinement and analysis program.
 Dolomanov et al., J. Appl. Cryst. (2009). 42, 339-341
;
 
_refine_special_details 
; 
 Refinement of F^2^ against ALL reflections.  The weighted R-factor wR and 
 goodness of fit S are based on F^2^, conventional R-factors R are based 
 on F, with F set to zero for negative F^2^. The threshold expression of 
 F^2^ > 2sigma(F^2^) is used only for calculating R-factors(gt) etc. and is 
 not relevant to the choice of reflections for refinement.  R-factors based 
 on F^2^ are statistically about twice as large as those based on F, and R- 
 factors based on ALL data will be even larger. 
; 
 
_refine_ls_structure_factor_coef  Fsqd  
_refine_ls_matrix_type            full 
_refine_ls_weighting_scheme       calc  
_refine_ls_weighting_details 
 'calc w=1/[\s^2^(Fo^2^)+(0.1244P)^2^+0.2765P] where P=(Fo^2^+2Fc^2^)/3' 
_atom_sites_solution_primary      direct 
_atom_sites_solution_secondary    difmap 
_atom_sites_solution_hydrogens    geom 
_refine_ls_hydrogen_treatment    constr 
_refine_ls_extinction_method      none 
_refine_ls_extinction_coef        ? 
_refine_ls_number_reflns          7744 
_refine_ls_number_parameters      549 
_refine_ls_number_restraints      0 
_refine_ls_R_factor_all           0.1416 
_refine_ls_R_factor_gt            0.0769 
_refine_ls_wR_factor_ref          0.2448 
_refine_ls_wR_factor_gt           0.2229 
_refine_ls_goodness_of_fit_ref    1.052 
_refine_ls_restrained_S_all       1.052 
_refine_ls_shift/su_max           0.001 
_refine_ls_shift/su_mean          0.000 
 
loop_ 
 _atom_site_label 
 _atom_site_type_symbol 
 _atom_site_fract_x 
 _atom_site_fract_y 
 _atom_site_fract_z 
 _atom_site_U_iso_or_equiv 
 _atom_site_adp_type 
 _atom_site_occupancy 
 _atom_site_symmetry_multiplicity 
 _atom_site_calc_flag 
 _atom_site_refinement_flags 
 _atom_site_disorder_assembly 
 _atom_site_disorder_group 
C1 C 0.2864(8) 0.2111(8) -0.0568(2) 0.163(3) Uani 1 1 d . . . 
H1 H 0.3283 0.2729 -0.0693 0.196 Uiso 1 1 calc R . . 
C2 C 0.3553(8) 0.1050(10) -0.0429(3) 0.171(3) Uani 1 1 d . . . 
H2 H 0.4410 0.0956 -0.0463 0.206 Uiso 1 1 calc R . . 
C3 C 0.2999(10) 0.0153(9) -0.02465(16) 0.149(3) Uani 1 1 d . . . 
H3 H 0.3475 -0.0523 -0.0133 0.179 Uiso 1 1 calc R . . 
C4 C 0.1667(9) 0.0244(7) -0.02267(16) 0.160(3) Uani 1 1 d . . . 
H4 H 0.1234 -0.0434 -0.0122 0.192 Uiso 1 1 calc R . . 
C5 C 0.1026(7) 0.1362(7) -0.03666(15) 0.141(2) Uani 1 1 d . . . 
H5 H 0.0160 0.1460 -0.0344 0.170 Uiso 1 1 calc R . . 
C6 C 0.1636(6) 0.2323(5) -0.05362(10) 0.0888(13) Uani 1 1 d . . . 
C67 C 1.1722(9) 0.6745(8) 0.3931(2) 0.0796(17) Uiso 0.50 1 d P A 1 
H67 H 1.0844 0.6742 0.3883 0.095 Uiso 0.50 1 calc PR A 1 
C7 C 0.0949(4) 0.3551(5) -0.06765(9) 0.0832(12) Uani 1 1 d . . . 
C8 C 0.0182(4) 0.3360(5) -0.09925(9) 0.0805(12) Uani 1 1 d . . . 
C66 C 0.6769(3) 0.3658(4) 0.09756(9) 0.0701(10) Uani 1 1 d . B . 
H66 H 0.6567 0.4102 0.0780 0.084 Uiso 1 1 calc R . . 
C9 C -0.0826(5) 0.4216(5) -0.10893(10) 0.0943(14) Uani 1 1 d . . . 
H9 H -0.1052 0.4914 -0.0952 0.113 Uiso 1 1 calc R . . 
C10 C -0.1501(5) 0.4055(6) -0.13852(10) 0.0996(14) Uani 1 1 d . . . 
H10 H -0.2178 0.4641 -0.1445 0.120 Uiso 1 1 calc R . . 
C11 C -0.1184(6) 0.3040(6) -0.15921(11) 0.1076(16) Uani 1 1 d . . . 
H11 H -0.1644 0.2934 -0.1791 0.129 Uiso 1 1 calc R . . 
C12 C -0.0191(6) 0.2185(5) -0.15044(11) 0.1054(16) Uani 1 1 d . . . 
H12 H 0.0035 0.1506 -0.1647 0.126 Uiso 1 1 calc R . . 
C13 C 0.0493(5) 0.2316(5) -0.12025(10) 0.0984(14) Uani 1 1 d . . . 
H13 H 0.1154 0.1710 -0.1142 0.118 Uiso 1 1 calc R . . 
C14 C 0.1022(4) 0.4755(4) -0.05315(9) 0.0857(12) Uani 1 1 d . B . 
H14 H 0.0585 0.5460 -0.0644 0.103 Uiso 1 1 calc R . . 
C15 C 0.1680(4) 0.5177(4) -0.02203(9) 0.0805(12) Uani 1 1 d . . . 
C16 C 0.1290(10) 0.6102(10) -0.0055(2) 0.077(2) Uani 0.50 1 d P B 1 
H16 H 0.0534 0.6536 -0.0128 0.093 Uiso 0.50 1 calc PR B 1 
C17 C 0.1909(10) 0.6554(9) 0.0239(2) 0.0737(19) Uani 0.50 1 d P B 1 
H17 H 0.1509 0.7246 0.0348 0.088 Uiso 0.50 1 calc PR B 1 
C18 C 0.1850(9) 0.6576(10) -0.0149(2) 0.077(2) Uani 0.50 1 d P B 2 
H18 H 0.1535 0.7222 -0.0300 0.093 Uiso 0.50 1 calc PR B 2 
C19 C 0.2462(9) 0.7030(10) 0.0134(2) 0.0737(19) Uani 0.50 1 d P B 2 
H19 H 0.2560 0.7970 0.0170 0.088 Uiso 0.50 1 calc PR B 2 
C20 C 0.2936(4) 0.6119(4) 0.03677(9) 0.0752(11) Uani 1 1 d . . . 
C21 C 0.2520(8) 0.4755(8) 0.03346(18) 0.0818(16) Uani 0.50 1 d P B 2 
H21 H 0.2662 0.4149 0.0507 0.098 Uiso 0.50 1 calc PR B 2 
C22 C 0.1904(8) 0.4300(9) 0.00494(18) 0.0867(17) Uani 0.50 1 d P B 2 
H22 H 0.1627 0.3392 0.0034 0.104 Uiso 0.50 1 calc PR B 2 
C23 C 0.3682(8) 0.5203(8) 0.01412(18) 0.0818(16) Uani 0.50 1 d P B 1 
H23 H 0.4525 0.4959 0.0197 0.098 Uiso 0.50 1 calc PR B 1 
C24 C 0.3052(9) 0.4760(8) -0.01464(18) 0.0867(17) Uani 0.50 1 d P B 1 
H24 H 0.3465 0.4219 -0.0290 0.104 Uiso 0.50 1 calc PR B 1 
C25 C 0.3601(4) 0.6595(4) 0.06737(8) 0.0694(10) Uani 1 1 d . B . 
C26 C 0.3319(4) 0.7856(4) 0.08076(9) 0.0837(12) Uani 1 1 d . . . 
H26 H 0.2696 0.8407 0.0701 0.100 Uiso 1 1 calc R B . 
C27 C 0.3936(4) 0.8322(4) 0.10944(9) 0.0793(11) Uani 1 1 d . B . 
H27 H 0.3714 0.9158 0.1183 0.095 Uiso 1 1 calc R . . 
C28 C 0.4883(3) 0.7523(3) 0.12454(8) 0.0615(9) Uani 1 1 d . . . 
C29 C 0.5221(3) 0.6243(3) 0.11164(8) 0.0609(9) Uani 1 1 d . B . 
C30 C 0.4542(4) 0.5784(3) 0.08355(8) 0.0670(10) Uani 1 1 d . . . 
H30 H 0.4718 0.4919 0.0754 0.080 Uiso 1 1 calc R B . 
C31 C 0.5703(3) 0.7765(3) 0.15423(8) 0.0580(9) Uani 1 1 d . B . 
C32 C 0.5733(4) 0.8854(3) 0.17582(8) 0.0677(10) Uani 1 1 d . . . 
H32 H 0.5174 0.9590 0.1724 0.081 Uiso 1 1 calc R B . 
C33 C 0.6607(3) 0.8830(3) 0.20251(8) 0.0633(9) Uani 1 1 d . B . 
H33 H 0.6643 0.9567 0.2168 0.076 Uiso 1 1 calc R . . 
C34 C 0.7435(3) 0.7723(3) 0.20840(7) 0.0526(8) Uani 1 1 d . . . 
C35 C 0.7382(3) 0.6625(3) 0.18662(7) 0.0534(8) Uani 1 1 d . B . 
H35 H 0.7912 0.5869 0.1907 0.064 Uiso 1 1 calc R . . 
C36 C 0.6549(3) 0.6649(3) 0.15901(7) 0.0529(8) Uani 1 1 d . . . 
C37 C 0.6314(3) 0.5663(3) 0.13169(7) 0.0552(8) Uani 1 1 d . B . 
C38 C 0.7010(3) 0.4533(3) 0.12620(8) 0.0569(8) Uani 1 1 d . . . 
C39 C 0.8176(3) 0.4175(4) 0.14593(8) 0.0652(9) Uani 1 1 d . B . 
H39 H 0.8735 0.4891 0.1516 0.078 Uiso 1 1 calc R . . 
C40 C 0.8517(4) 0.2920(4) 0.15658(10) 0.0806(11) Uani 1 1 d . . . 
H40 H 0.9264 0.2866 0.1701 0.097 Uiso 1 1 calc R B . 
C41 C 0.7867(5) 0.1650(4) 0.14959(14) 0.0980(14) Uani 1 1 d . B . 
H41 H 0.7977 0.0958 0.1650 0.118 Uiso 1 1 calc R . . 
C42 C 0.7121(5) 0.1365(4) 0.12310(14) 0.0953(14) Uani 1 1 d . . . 
H42 H 0.6768 0.0488 0.1216 0.114 Uiso 1 1 calc R B . 
C43 C 0.6813(4) 0.2272(4) 0.09696(11) 0.0842(12) Uani 1 1 d . B . 
H43 H 0.6616 0.1862 0.0769 0.101 Uiso 1 1 calc R . . 
C44 C 0.8340(3) 0.7680(3) 0.23768(7) 0.0513(8) Uani 1 1 d . B . 
C45 C 0.8115(3) 0.8398(4) 0.26541(8) 0.0713(10) Uani 1 1 d . . . 
H45 H 0.7388 0.8941 0.2656 0.086 Uiso 1 1 calc R B . 
C46 C 0.8940(3) 0.8327(4) 0.29269(8) 0.0721(10) Uani 1 1 d . B . 
H46 H 0.8745 0.8817 0.3109 0.086 Uiso 1 1 calc R . . 
C47 C 1.0041(3) 0.7566(3) 0.29434(7) 0.0530(8) Uani 1 1 d . . . 
C48 C 1.0273(3) 0.6844(3) 0.26650(8) 0.0621(9) Uani 1 1 d . B . 
H48 H 1.1007 0.6312 0.2664 0.075 Uiso 1 1 calc R . . 
C49 C 0.9439(3) 0.6900(3) 0.23901(8) 0.0599(9) Uani 1 1 d . . . 
H49 H 0.9623 0.6397 0.2209 0.072 Uiso 1 1 calc R B . 
C50 C 1.0798(3) 0.7483(3) 0.32535(8) 0.0605(9) Uani 1 1 d . B . 
H50 H 1.0359 0.7715 0.3431 0.073 Uiso 1 1 calc R . . 
C51 C 1.2010(3) 0.7134(3) 0.33258(8) 0.0561(8) Uani 1 1 d . . . 
C52 C 1.2552(3) 0.6974(4) 0.36685(8) 0.0660(9) Uani 1 1 d . A . 
C53 C 1.3776(4) 0.6595(5) 0.37487(10) 0.0937(13) Uani 1 1 d . . . 
H53 H 1.4303 0.6441 0.3583 0.112 Uiso 1 1 calc R B . 
C54 C 1.4281(5) 0.6427(5) 0.40668(12) 0.1059(15) Uani 1 1 d . B . 
H54 H 1.5136 0.6203 0.4111 0.127 Uiso 1 1 calc R . . 
C55 C 1.3550(6) 0.6585(7) 0.43036(12) 0.131(2) Uani 1 1 d . . . 
H55 H 1.3917 0.6734 0.4512 0.157 Uiso 0.50 1 calc PR B 1 
H55A H 1.3740 0.6180 0.4505 0.157 Uiso 0.50 1 calc PR B 2 
C56 C 1.2205(9) 0.6534(10) 0.4247(2) 0.096(2) Uiso 0.50 1 d P A 1 
H56 H 1.1679 0.6367 0.4412 0.115 Uiso 0.50 1 calc PR A 1 
C58 C 1.1867(9) 0.7463(9) 0.3917(2) 0.0796(17) Uiso 0.50 1 d P A 2 
H58 H 1.1049 0.7812 0.3874 0.095 Uiso 0.50 1 calc PR A 2 
C59 C 1.2443(9) 0.7417(10) 0.4236(2) 0.096(2) Uiso 0.50 1 d P A 2 
H59 H 1.2106 0.7921 0.4399 0.115 Uiso 0.50 1 calc PR A 2 
C60 C 1.3323(4) 0.5643(4) 0.29859(10) 0.0832(12) Uani 1 1 d . . . 
H60 H 1.3101 0.4879 0.3104 0.100 Uiso 1 1 calc R B . 
C61 C 1.4089(5) 0.5475(5) 0.27315(13) 0.1045(15) Uani 1 1 d . B . 
H61 H 1.4366 0.4601 0.2678 0.125 Uiso 1 1 calc R . . 
C62 C 1.4430(5) 0.6585(7) 0.25620(12) 0.1076(15) Uani 1 1 d . . . 
H62 H 1.4953 0.6474 0.2394 0.129 Uiso 1 1 calc R B . 
C63 C 1.4015(5) 0.7857(5) 0.26354(11) 0.0987(14) Uani 1 1 d . B . 
H63 H 1.4244 0.8613 0.2516 0.118 Uiso 1 1 calc R . . 
C64 C 1.3255(4) 0.8036(4) 0.28858(9) 0.0761(10) Uani 1 1 d . . . 
H64 H 1.2982 0.8916 0.2935 0.091 Uiso 1 1 calc R B . 
C65 C 1.2889(3) 0.6926(3) 0.30658(8) 0.0585(9) Uani 1 1 d . B . 
 
loop_ 
 _atom_site_aniso_label 
 _atom_site_aniso_U_11 
 _atom_site_aniso_U_22 
 _atom_site_aniso_U_33 
 _atom_site_aniso_U_23 
 _atom_site_aniso_U_13 
 _atom_site_aniso_U_12 
C1 0.110(5) 0.155(6) 0.223(8) 0.066(6) 0.008(5) -0.034(5) 
C2 0.120(6) 0.173(7) 0.221(9) 0.011(7) 0.011(6) -0.032(6) 
C3 0.177(8) 0.171(7) 0.095(4) -0.012(4) -0.015(5) 0.059(6) 
C4 0.206(8) 0.155(6) 0.127(5) 0.047(4) 0.061(5) 0.053(6) 
C5 0.151(5) 0.153(5) 0.128(5) 0.050(4) 0.056(4) 0.037(4) 
C6 0.107(4) 0.106(3) 0.054(2) -0.010(2) 0.004(2) -0.031(3) 
C7 0.101(3) 0.098(3) 0.048(2) 0.005(2) -0.005(2) -0.035(3) 
C8 0.097(3) 0.093(3) 0.050(2) -0.004(2) -0.002(2) -0.036(2) 
C66 0.077(3) 0.074(2) 0.059(2) -0.0140(18) 0.0038(19) -0.0041(19) 
C9 0.095(3) 0.132(4) 0.055(3) -0.011(2) -0.001(2) -0.034(3) 
C10 0.098(3) 0.139(4) 0.059(3) -0.007(3) -0.006(2) -0.026(3) 
C11 0.122(4) 0.138(4) 0.059(3) -0.004(3) -0.013(3) -0.047(4) 
C12 0.142(5) 0.108(3) 0.064(3) -0.020(2) 0.000(3) -0.042(3) 
C13 0.127(4) 0.101(3) 0.064(3) -0.007(2) -0.011(3) -0.034(3) 
C14 0.104(3) 0.096(3) 0.054(2) 0.002(2) -0.012(2) -0.024(2) 
C15 0.101(3) 0.085(3) 0.050(2) 0.002(2) -0.021(2) -0.017(2) 
C16 0.084(7) 0.073(5) 0.071(5) 0.003(4) -0.018(4) -0.009(4) 
C17 0.083(6) 0.080(5) 0.056(5) -0.003(3) -0.005(4) -0.001(4) 
C18 0.084(7) 0.073(5) 0.071(5) 0.003(4) -0.018(4) -0.009(4) 
C19 0.083(6) 0.080(5) 0.056(5) -0.003(3) -0.005(4) -0.001(4) 
C20 0.091(3) 0.074(2) 0.056(2) -0.0024(19) -0.021(2) -0.004(2) 
C21 0.094(4) 0.091(4) 0.056(3) -0.002(3) -0.015(3) -0.007(3) 
C22 0.109(5) 0.094(4) 0.055(3) -0.015(3) -0.004(3) -0.021(3) 
C23 0.094(4) 0.091(4) 0.056(3) -0.002(3) -0.015(3) -0.007(3) 
C24 0.109(5) 0.094(4) 0.055(3) -0.015(3) -0.004(3) -0.021(3) 
C25 0.085(3) 0.067(2) 0.053(2) -0.0030(18) -0.014(2) -0.006(2) 
C26 0.092(3) 0.080(3) 0.074(3) 0.001(2) -0.025(2) 0.009(2) 
C27 0.091(3) 0.074(2) 0.067(2) -0.0063(19) -0.023(2) 0.006(2) 
C28 0.073(2) 0.0592(19) 0.0497(19) -0.0044(16) -0.0086(18) -0.0007(17) 
C29 0.074(2) 0.062(2) 0.0453(19) 0.0002(16) -0.0040(17) -0.0068(17) 
C30 0.083(3) 0.064(2) 0.051(2) -0.0081(17) -0.0097(19) -0.0063(19) 
C31 0.067(2) 0.0581(19) 0.0478(19) 0.0002(16) -0.0038(16) -0.0008(17) 
C32 0.086(3) 0.0568(19) 0.057(2) -0.0057(17) -0.010(2) 0.0105(18) 
C33 0.078(2) 0.061(2) 0.050(2) -0.0084(16) 0.0002(19) 0.0036(18) 
C34 0.055(2) 0.0563(18) 0.0462(18) -0.0033(15) 0.0043(16) -0.0047(16) 
C35 0.055(2) 0.0594(18) 0.0456(18) -0.0020(15) 0.0020(15) -0.0003(15) 
C36 0.055(2) 0.0563(18) 0.0468(19) -0.0014(15) 0.0022(16) -0.0051(16) 
C37 0.066(2) 0.0528(18) 0.0461(18) -0.0006(15) -0.0010(16) -0.0063(17) 
C38 0.064(2) 0.0592(19) 0.0477(19) 0.0002(16) 0.0052(17) -0.0107(17) 
C39 0.061(2) 0.078(2) 0.058(2) -0.0070(18) 0.0088(18) 0.0012(19) 
C40 0.068(3) 0.100(3) 0.073(3) -0.005(2) 0.005(2) 0.021(2) 
C41 0.098(4) 0.074(3) 0.122(4) 0.011(3) 0.012(3) 0.014(3) 
C42 0.096(3) 0.064(2) 0.127(4) -0.010(3) 0.017(3) -0.003(2) 
C43 0.080(3) 0.084(3) 0.089(3) -0.030(2) 0.010(2) -0.002(2) 
C44 0.051(2) 0.0568(18) 0.0461(18) -0.0053(15) 0.0031(15) -0.0045(15) 
C45 0.061(2) 0.097(3) 0.054(2) -0.0185(19) -0.0029(18) 0.019(2) 
C46 0.065(2) 0.103(3) 0.047(2) -0.0196(19) 0.0022(18) 0.011(2) 
C47 0.049(2) 0.0648(19) 0.0452(18) -0.0052(15) 0.0029(15) -0.0026(16) 
C48 0.060(2) 0.067(2) 0.058(2) -0.0085(17) -0.0015(17) 0.0058(17) 
C49 0.066(2) 0.0626(19) 0.051(2) -0.0143(16) 0.0042(17) 0.0005(18) 
C50 0.058(2) 0.077(2) 0.0465(19) -0.0097(16) 0.0046(17) -0.0035(18) 
C51 0.057(2) 0.0583(19) 0.052(2) -0.0014(15) -0.0024(17) -0.0025(16) 
C52 0.062(2) 0.080(2) 0.055(2) -0.0054(18) -0.0034(18) -0.0006(18) 
C53 0.066(3) 0.155(4) 0.059(2) 0.014(2) -0.002(2) 0.013(3) 
C54 0.078(3) 0.166(5) 0.071(3) 0.019(3) -0.014(3) 0.005(3) 
C55 0.121(5) 0.209(6) 0.059(3) -0.007(3) -0.011(3) 0.028(4) 
C60 0.086(3) 0.077(3) 0.086(3) 0.007(2) 0.003(3) 0.017(2) 
C61 0.104(4) 0.104(3) 0.108(4) -0.011(3) 0.021(3) 0.043(3) 
C62 0.092(3) 0.139(5) 0.096(4) 0.001(3) 0.030(3) 0.020(3) 
C63 0.101(3) 0.113(4) 0.085(3) 0.014(3) 0.027(3) 0.002(3) 
C64 0.081(3) 0.076(2) 0.072(2) 0.001(2) 0.008(2) -0.004(2) 
C65 0.054(2) 0.065(2) 0.055(2) -0.0024(17) -0.0041(17) 0.0032(17) 
 
_geom_special_details 
; 
 All esds (except the esd in the dihedral angle between two l.s. planes) 
 are estimated using the full covariance matrix.  The cell esds are taken 
 into account individually in the estimation of esds in distances, angles 
 and torsion angles; correlations between esds in cell parameters are only 
 used when they are defined by crystal symmetry.  An approximate (isotropic) 
 treatment of cell esds is used for estimating esds involving l.s. planes. 
; 
 
loop_ 
 _geom_bond_atom_site_label_1 
 _geom_bond_atom_site_label_2 
 _geom_bond_distance 
 _geom_bond_site_symmetry_2 
 _geom_bond_publ_flag 
C1 C6 1.327(8) . ? 
C1 C2 1.361(10) . ? 
C1 H1 0.9300 . ? 
C2 C3 1.321(10) . ? 
C2 H2 0.9300 . ? 
C3 C4 1.415(9) . ? 
C3 H3 0.9300 . ? 
C4 C5 1.382(8) . ? 
C4 H4 0.9300 . ? 
C5 C6 1.363(7) . ? 
C5 H5 0.9300 . ? 
C6 C7 1.489(6) . ? 
C67 C56 1.381(11) . ? 
C67 C52 1.470(9) . ? 
C67 H67 0.9300 . ? 
C7 C14 1.315(5) . ? 
C7 C8 1.495(5) . ? 
C8 C9 1.382(6) . ? 
C8 C13 1.394(6) . ? 
C66 C43 1.348(5) . ? 
C66 C38 1.467(5) . ? 
C66 H66 0.9300 . ? 
C9 C10 1.377(5) . ? 
C9 H9 0.9300 . ? 
C10 C11 1.367(7) . ? 
C10 H10 0.9300 . ? 
C11 C12 1.362(7) . ? 
C11 H11 0.9300 . ? 
C12 C13 1.400(6) . ? 
C12 H12 0.9300 . ? 
C13 H13 0.9300 . ? 
C14 C15 1.473(5) . ? 
C14 H14 0.9300 . ? 
C15 C16 1.224(11) . ? 
C15 C18 1.400(10) . ? 
C15 C22 1.411(9) . ? 
C15 C24 1.509(10) . ? 
C16 C17 1.406(13) . ? 
C16 H16 0.9300 . ? 
C17 C20 1.241(10) . ? 
C17 H17 0.9300 . ? 
C18 C19 1.366(12) . ? 
C18 H18 0.9300 . ? 
C19 C20 1.376(10) . ? 
C19 H19 0.9300 . ? 
C20 C21 1.399(8) . ? 
C20 C25 1.474(5) . ? 
C20 C23 1.555(9) . ? 
C21 C22 1.376(10) . ? 
C21 H21 0.9300 . ? 
C22 H22 0.9300 . ? 
C23 C24 1.386(10) . ? 
C23 H23 0.9300 . ? 
C24 H24 0.9300 . ? 
C25 C26 1.388(5) . ? 
C25 C30 1.394(5) . ? 
C26 C27 1.385(5) . ? 
C26 H26 0.9300 . ? 
C27 C28 1.374(5) . ? 
C27 H27 0.9300 . ? 
C28 C29 1.411(5) . ? 
C28 C31 1.466(4) . ? 
C29 C30 1.391(4) . ? 
C29 C37 1.476(4) . ? 
C30 H30 0.9300 . ? 
C31 C32 1.385(4) . ? 
C31 C36 1.407(4) . ? 
C32 C33 1.381(4) . ? 
C32 H32 0.9300 . ? 
C33 C34 1.394(4) . ? 
C33 H33 0.9300 . ? 
C34 C35 1.397(4) . ? 
C34 C44 1.482(4) . ? 
C35 C36 1.386(4) . ? 
C35 H35 0.9300 . ? 
C36 C37 1.490(4) . ? 
C37 C38 1.350(4) . ? 
C38 C39 1.461(5) . ? 
C39 C40 1.337(5) . ? 
C39 H39 0.9300 . ? 
C40 C41 1.429(6) . ? 
C40 H40 0.9300 . ? 
C41 C42 1.327(6) . ? 
C41 H41 0.9300 . ? 
C42 C43 1.415(6) . ? 
C42 H42 0.9300 . ? 
C43 H43 0.9300 . ? 
C44 C49 1.382(4) . ? 
C44 C45 1.384(4) . ? 
C45 C46 1.372(4) . ? 
C45 H45 0.9300 . ? 
C46 C47 1.373(5) . ? 
C46 H46 0.9300 . ? 
C47 C48 1.391(4) . ? 
C47 C50 1.460(4) . ? 
C48 C49 1.384(4) . ? 
C48 H48 0.9300 . ? 
C49 H49 0.9300 . ? 
C50 C51 1.331(5) . ? 
C50 H50 0.9300 . ? 
C51 C65 1.493(5) . ? 
C51 C52 1.497(4) . ? 
C52 C53 1.356(5) . ? 
C52 C58 1.389(9) . ? 
C53 C54 1.392(6) . ? 
C53 H53 0.9300 . ? 
C54 C55 1.307(7) . ? 
C54 H54 0.9300 . ? 
C55 C56 1.419(11) . ? 
C55 C59 1.428(10) . ? 
C55 H55 0.9300 . ? 
C55 H55A 0.9300 . ? 
C56 H56 0.9300 . ? 
C58 C59 1.412(12) . ? 
C58 H58 0.9300 . ? 
C59 H59 0.9300 . ? 
C60 C65 1.378(5) . ? 
C60 C61 1.391(6) . ? 
C60 H60 0.9300 . ? 
C61 C62 1.353(7) . ? 
C61 H61 0.9300 . ? 
C62 C63 1.354(6) . ? 
C62 H62 0.9300 . ? 
C63 C64 1.375(6) . ? 
C63 H63 0.9300 . ? 
C64 C65 1.385(5) . ? 
C64 H64 0.9300 . ? 
 
loop_ 
 _geom_angle_atom_site_label_1 
 _geom_angle_atom_site_label_2 
 _geom_angle_atom_site_label_3 
 _geom_angle 
 _geom_angle_site_symmetry_1 
 _geom_angle_site_symmetry_3 
 _geom_angle_publ_flag 
C6 C1 C2 124.5(7) . . ? 
C6 C1 H1 117.8 . . ? 
C2 C1 H1 117.8 . . ? 
C3 C2 C1 119.8(8) . . ? 
C3 C2 H2 120.1 . . ? 
C1 C2 H2 120.1 . . ? 
C2 C3 C4 118.6(7) . . ? 
C2 C3 H3 120.7 . . ? 
C4 C3 H3 120.7 . . ? 
C5 C4 C3 118.5(7) . . ? 
C5 C4 H4 120.8 . . ? 
C3 C4 H4 120.8 . . ? 
C6 C5 C4 121.4(6) . . ? 
C6 C5 H5 119.3 . . ? 
C4 C5 H5 119.3 . . ? 
C1 C6 C5 116.7(5) . . ? 
C1 C6 C7 122.2(5) . . ? 
C5 C6 C7 121.1(5) . . ? 
C56 C67 C52 122.1(8) . . ? 
C56 C67 H67 118.9 . . ? 
C52 C67 H67 118.9 . . ? 
C14 C7 C6 121.7(3) . . ? 
C14 C7 C8 121.3(4) . . ? 
C6 C7 C8 117.0(4) . . ? 
C9 C8 C13 118.1(4) . . ? 
C9 C8 C7 121.8(4) . . ? 
C13 C8 C7 120.1(4) . . ? 
C43 C66 C38 126.2(4) . . ? 
C43 C66 H66 116.9 . . ? 
C38 C66 H66 116.9 . . ? 
C10 C9 C8 121.3(5) . . ? 
C10 C9 H9 119.4 . . ? 
C8 C9 H9 119.4 . . ? 
C11 C10 C9 120.5(5) . . ? 
C11 C10 H10 119.7 . . ? 
C9 C10 H10 119.7 . . ? 
C12 C11 C10 119.6(4) . . ? 
C12 C11 H11 120.2 . . ? 
C10 C11 H11 120.2 . . ? 
C11 C12 C13 120.8(5) . . ? 
C11 C12 H12 119.6 . . ? 
C13 C12 H12 119.6 . . ? 
C8 C13 C12 119.8(5) . . ? 
C8 C13 H13 120.1 . . ? 
C12 C13 H13 120.1 . . ? 
C7 C14 C15 130.9(4) . . ? 
C7 C14 H14 114.6 . . ? 
C15 C14 H14 114.6 . . ? 
C16 C15 C18 37.9(5) . . ? 
C16 C15 C22 92.2(6) . . ? 
C18 C15 C22 114.1(6) . . ? 
C16 C15 C14 122.8(6) . . ? 
C18 C15 C14 119.9(5) . . ? 
C22 C15 C14 124.3(4) . . ? 
C16 C15 C24 116.3(6) . . ? 
C18 C15 C24 96.5(5) . . ? 
C22 C15 C24 65.3(5) . . ? 
C14 C15 C24 118.5(5) . . ? 
C15 C16 C17 124.4(10) . . ? 
C15 C16 H16 117.8 . . ? 
C17 C16 H16 117.8 . . ? 
C20 C17 C16 126.4(9) . . ? 
C20 C17 H17 116.8 . . ? 
C16 C17 H17 116.8 . . ? 
C19 C18 C15 122.6(8) . . ? 
C19 C18 H18 118.7 . . ? 
C15 C18 H18 118.7 . . ? 
C18 C19 C20 121.1(8) . . ? 
C18 C19 H19 119.4 . . ? 
C20 C19 H19 119.4 . . ? 
C17 C20 C19 39.2(4) . . ? 
C17 C20 C21 91.4(6) . . ? 
C19 C20 C21 116.6(6) . . ? 
C17 C20 C25 126.8(6) . . ? 
C19 C20 C25 121.7(5) . . ? 
C21 C20 C25 120.3(4) . . ? 
C17 C20 C23 113.7(6) . . ? 
C19 C20 C23 96.6(5) . . ? 
C21 C20 C23 64.4(5) . . ? 
C25 C20 C23 118.2(4) . . ? 
C22 C21 C20 120.7(7) . . ? 
C22 C21 H21 119.7 . . ? 
C20 C21 H21 119.7 . . ? 
C21 C22 C15 121.7(7) . . ? 
C21 C22 H22 119.1 . . ? 
C15 C22 H22 119.1 . . ? 
C24 C23 C20 118.0(7) . . ? 
C24 C23 H23 121.0 . . ? 
C20 C23 H23 121.0 . . ? 
C23 C24 C15 118.4(7) . . ? 
C23 C24 H24 120.8 . . ? 
C15 C24 H24 120.8 . . ? 
C26 C25 C30 118.2(3) . . ? 
C26 C25 C20 121.3(3) . . ? 
C30 C25 C20 120.4(3) . . ? 
C27 C26 C25 122.2(4) . . ? 
C27 C26 H26 118.9 . . ? 
C25 C26 H26 118.9 . . ? 
C28 C27 C26 118.7(4) . . ? 
C28 C27 H27 120.7 . . ? 
C26 C27 H27 120.7 . . ? 
C27 C28 C29 121.4(3) . . ? 
C27 C28 C31 130.4(3) . . ? 
C29 C28 C31 108.2(3) . . ? 
C30 C29 C28 118.2(3) . . ? 
C30 C29 C37 132.4(3) . . ? 
C28 C29 C37 109.4(3) . . ? 
C29 C30 C25 121.2(3) . . ? 
C29 C30 H30 119.4 . . ? 
C25 C30 H30 119.4 . . ? 
C32 C31 C36 121.1(3) . . ? 
C32 C31 C28 130.4(3) . . ? 
C36 C31 C28 108.5(3) . . ? 
C33 C32 C31 119.0(3) . . ? 
C33 C32 H32 120.5 . . ? 
C31 C32 H32 120.5 . . ? 
C32 C33 C34 121.4(3) . . ? 
C32 C33 H33 119.3 . . ? 
C34 C33 H33 119.3 . . ? 
C33 C34 C35 119.0(3) . . ? 
C33 C34 C44 121.1(3) . . ? 
C35 C34 C44 119.9(3) . . ? 
C36 C35 C34 120.8(3) . . ? 
C36 C35 H35 119.6 . . ? 
C34 C35 H35 119.6 . . ? 
C35 C36 C31 118.7(3) . . ? 
C35 C36 C37 132.3(3) . . ? 
C31 C36 C37 108.9(3) . . ? 
C38 C37 C29 128.6(3) . . ? 
C38 C37 C36 126.4(3) . . ? 
C29 C37 C36 104.9(3) . . ? 
C37 C38 C39 122.8(3) . . ? 
C37 C38 C66 123.2(3) . . ? 
C39 C38 C66 113.4(3) . . ? 
C40 C39 C38 126.4(3) . . ? 
C40 C39 H39 116.8 . . ? 
C38 C39 H39 116.8 . . ? 
C39 C40 C41 127.5(4) . . ? 
C39 C40 H40 116.2 . . ? 
C41 C40 H40 116.2 . . ? 
C42 C41 C40 126.1(4) . . ? 
C42 C41 H41 116.9 . . ? 
C40 C41 H41 116.9 . . ? 
C41 C42 C43 126.1(4) . . ? 
C41 C42 H42 117.0 . . ? 
C43 C42 H42 117.0 . . ? 
C66 C43 C42 127.9(4) . . ? 
C66 C43 H43 116.1 . . ? 
C42 C43 H43 116.1 . . ? 
C49 C44 C45 116.3(3) . . ? 
C49 C44 C34 121.9(3) . . ? 
C45 C44 C34 121.7(3) . . ? 
C46 C45 C44 121.5(3) . . ? 
C46 C45 H45 119.3 . . ? 
C44 C45 H45 119.3 . . ? 
C45 C46 C47 122.9(3) . . ? 
C45 C46 H46 118.5 . . ? 
C47 C46 H46 118.5 . . ? 
C46 C47 C48 115.9(3) . . ? 
C46 C47 C50 118.1(3) . . ? 
C48 C47 C50 125.8(3) . . ? 
C49 C48 C47 121.5(3) . . ? 
C49 C48 H48 119.2 . . ? 
C47 C48 H48 119.2 . . ? 
C44 C49 C48 121.9(3) . . ? 
C44 C49 H49 119.1 . . ? 
C48 C49 H49 119.1 . . ? 
C51 C50 C47 131.1(3) . . ? 
C51 C50 H50 114.5 . . ? 
C47 C50 H50 114.5 . . ? 
C50 C51 C65 120.8(3) . . ? 
C50 C51 C52 121.6(3) . . ? 
C65 C51 C52 117.6(3) . . ? 
C53 C52 C58 116.9(5) . . ? 
C53 C52 C67 112.8(4) . . ? 
C58 C52 C67 28.9(4) . . ? 
C53 C52 C51 122.8(3) . . ? 
C58 C52 C51 119.3(5) . . ? 
C67 C52 C51 121.2(4) . . ? 
C52 C53 C54 123.1(4) . . ? 
C52 C53 H53 118.4 . . ? 
C54 C53 H53 118.4 . . ? 
C55 C54 C53 119.8(5) . . ? 
C55 C54 H54 120.1 . . ? 
C53 C54 H54 120.1 . . ? 
C54 C55 C56 120.9(6) . . ? 
C54 C55 C59 116.1(6) . . ? 
C56 C55 C59 36.7(4) . . ? 
C54 C55 H55 119.6 . . ? 
C56 C55 H55 119.6 . . ? 
C59 C55 H55 111.5 . . ? 
C54 C55 H55A 121.9 . . ? 
C56 C55 H55A 105.8 . . ? 
C59 C55 H55A 121.9 . . ? 
H55 C55 H55A 35.7 . . ? 
C67 C56 C55 116.0(8) . . ? 
C67 C56 H56 122.0 . . ? 
C55 C56 H56 122.0 . . ? 
C52 C58 C59 118.4(8) . . ? 
C52 C58 H58 120.8 . . ? 
C59 C58 H58 120.8 . . ? 
C58 C59 C55 119.0(8) . . ? 
C58 C59 H59 120.5 . . ? 
C55 C59 H59 120.5 . . ? 
C65 C60 C61 121.0(4) . . ? 
C65 C60 H60 119.5 . . ? 
C61 C60 H60 119.5 . . ? 
C62 C61 C60 119.8(4) . . ? 
C62 C61 H61 120.1 . . ? 
C60 C61 H61 120.1 . . ? 
C61 C62 C63 120.4(5) . . ? 
C61 C62 H62 119.8 . . ? 
C63 C62 H62 119.8 . . ? 
C62 C63 C64 120.3(4) . . ? 
C62 C63 H63 119.8 . . ? 
C64 C63 H63 119.8 . . ? 
C63 C64 C65 121.0(4) . . ? 
C63 C64 H64 119.5 . . ? 
C65 C64 H64 119.5 . . ? 
C60 C65 C64 117.5(4) . . ? 
C60 C65 C51 122.3(3) . . ? 
C64 C65 C51 120.1(3) . . ? 
 
_diffrn_measured_fraction_theta_max    0.997 
_diffrn_reflns_theta_full              25.35 
_diffrn_measured_fraction_theta_full   0.997 
_refine_diff_density_max    0.405 
_refine_diff_density_min   -0.381 
_refine_diff_density_rms    0.038 
